# Supplementary material
Source: PubMed Central journal article supplement (PMC9513331)
Supplement: mmc1.pdf [file mmc1.pdf]

**Supplemental information**

**Interval between prior SARS-CoV-2 infection  
and booster vaccination impacts magnitude  
and quality of antibody and B cell responses**

**Clarisa M. Buckner, Lela Kardava, Omar El Merhebi, Sandeep R. Narpala, Leonid Serebryanny, Bob C. Lin, Wei Wang, Xiaozhen Zhang, Felipe Lopes de Assis, Sophie E.M. Kelly, I-Ting Teng, Genevieve E. McCormack, Lauren H. Praiss, Catherine A. Seamon, M. Ali Rai, Heather Kalish, Peter D. Kwong, Michael A. Proshan, Adrian B. McDermott, Anthony S. Fauci, Tae-Wook Chun, and Susan Moir**

**Table S1: Study subjects and schedules  
Related to Table 1**

| Study ID             | COVID-19 date | Method of COVID-19 diagnosis | Symptomatic COVID-19 | Vaccine | Dose 1 date | Dose 2 date | Booster date | Days dose 1 to booster | Days COVID-19 to booster | Days booster to COVID-19 | Gender at birth | Age - years | Days booster to Day 30 | Days booster to Day60 |
|----------------------|---------------|------------------------------|----------------------|---------|-------------|-------------|--------------|------------------------|--------------------------|--------------------------|-----------------|-------------|------------------------|-----------------------|
| 00001                |               |                              |                      | Moderna | 1/4/21      | 2/3/21      | 12/2/21      | 332                    |                          |                          | Male            | 65          | 32                     | 60                    |
| 00002                |               |                              |                      | Moderna | 12/29/20    | 1/26/21     | 12/7/21      | 343                    |                          |                          | Female          | 58          | 31                     | 56                    |
| 00003                |               |                              |                      | Moderna | 1/4/21      | 1/29/21     | 11/18/21     | 318                    |                          |                          | Female          | 44          | 29                     | 56                    |
| 00004                |               |                              |                      | Moderna | 1/15/21     | 2/11/21     | 11/19/21     | 308                    |                          |                          | Male            | 36          | 26                     | 56                    |
| 00005                |               |                              |                      | Moderna | 1/20/21     | 2/17/21     | 11/17/21     | 301                    |                          |                          | Male            | 53          | 29                     | 58                    |
| 00006                |               |                              |                      | Moderna | 3/15/21     | 4/12/21     | 11/17/21     | 247                    |                          |                          | Male            | 36          | 28                     | 64                    |
| 00007                |               |                              |                      | Moderna | 2/18/21     | 3/18/21     | 11/1/21      | 256                    |                          |                          | Female          | 64          | 31                     | 59                    |
| 00008                |               |                              |                      | Moderna | 1/5/21      | 2/2/21      | 10/27/21     | 295                    |                          |                          | Female          | 61          | 28                     | 55                    |
| 00009                |               |                              |                      | Moderna | 1/6/21      | 2/3/21      | 12/6/21      | 334                    |                          |                          | Male            | 54          | 28                     | 59                    |
| 00011                |               |                              |                      | Moderna | 12/29/20    | 1/27/21     | 11/22/21     | 328                    |                          |                          | Female          | 51          | 29                     | 60                    |
| 00012                | 1/8/21        | PCR                          | yes                  | Moderna | 2/11/21     | 3/12/21     | 12/7/21      | 299                    | 333                      |                          | Female          | 42          | 30                     | 64                    |
| 00013                |               |                              |                      | Moderna | 1/6/21      | 2/2/21      | 11/15/21     | 313                    |                          |                          | Female          | 55          | 29                     | 59                    |
| 00014 R              |               |                              |                      | Moderna | 1/6/21      | 2/3/21      | 12/8/21      | 336                    |                          |                          | Female          | 55          | 28                     | 57                    |
| 00015                | 1/4/22        | PCR                          | yes                  | Moderna | 1/19/21     | 2/19/21     | 12/7/21      | 322                    |                          | 28                       | Female          | 56          | 28                     | 57                    |
| 00016                |               |                              |                      | Moderna | 4/7/21      | 5/5/21      | 11/17/21     | 224                    |                          |                          | Female          | 35          | 28                     | 64                    |
| 00017                |               |                              |                      | Pfizer  | 4/7/21      | 4/28/21     | 10/28/21     | 204                    |                          |                          | Male            | 65          | 32                     | 62                    |
| 00018                |               |                              |                      | Moderna | 1/4/21      | 1/29/21     | 10/29/21     | 298                    |                          |                          | Male            | 65          | 31                     | 61                    |
| 00020                |               |                              |                      | Moderna | 12/31/20    | 1/27/21     | 11/15/21     | 319                    |                          |                          | Female          | 62          | 30                     | 59                    |
| 00021 R              | 11/28/20      | PCR                          | yes                  | Pfizer  | 3/1/21      | 4/1/21      | 11/12/21     | 256                    | 349                      |                          | Female          | 31          | 32                     | 63                    |
| 00022                |               |                              |                      | Moderna | 1/12/21     | 2/11/21     | 11/1/21      | 293                    |                          |                          | Male            | 54          | 29                     | 73                    |
| 00024                |               |                              |                      | Mixed   | 3/11/21     | 4/2/21      | 11/4/21      | 238                    |                          |                          | Male            | 22          | 28                     | 60                    |
| 00025                |               |                              |                      | Moderna | 12/28/20    | 1/26/21     | 11/18/21     | 325                    |                          |                          | Female          | 58          | 32                     | 61                    |
| 00028 R              |               |                              |                      | Moderna | 12/29/20    | 2/26/21     | 12/7/21      | 343                    |                          |                          | Female          | 53          | 28                     | 59                    |
| 00032 R              |               |                              |                      | Moderna | 12/28/20    | 1/25/21     | 11/15/21     | 322                    |                          |                          | Female          | 60          | 30                     | 64                    |
| 00035                |               |                              |                      | Pfizer  | 3/14/21     | 4/8/21      | 11/11/21     | 242                    |                          |                          | Male            | 56          | 32                     | 57                    |
| 00041 R              |               |                              |                      | Pfizer  | 3/3/21      | 5/24/21     | 12/17/21     | 289                    |                          |                          | Male            | 64          | 32                     | 63                    |
| 00042 R              |               |                              |                      | Moderna | 2/12/21     | 3/13/21     | 12/11/21     | 302                    |                          |                          | Female          | 49          | 32                     | 61                    |
| 00043 R              |               |                              |                      | Moderna | 12/30/20    | 1/27/21     | 11/15/21     | 320                    |                          |                          | Female          | 60          | 29                     | 64                    |
| 00046                |               |                              |                      | Moderna | 12/31/20    | 1/28/21     | 11/17/21     | 321                    |                          |                          | Male            | 56          | 28                     | 64                    |
| 00048 R              |               |                              |                      | Moderna | 1/7/21      | 2/2/21      | 12/9/21      | 336                    |                          |                          | Female          | 65          | 32                     | 60                    |
| 00049 R              |               |                              |                      | Moderna | 1/8/21      | 2/5/21      | 11/22/21     | 318                    |                          |                          | Female          | 70          | 28                     | 64                    |
| 00050                |               |                              |                      | Moderna | 1/7/21      | 2/5/21      | 11/30/21     | 327                    |                          |                          | Female          | 40          | 30                     | 56                    |
| 00055 R              |               |                              |                      | Moderna | 1/7/21      | 2/4/21      | 11/19/21     | 316                    |                          |                          | Female          | 30          | 32                     | 60                    |
| 00056                | 10/10/21      | PCR                          | no                   | Moderna | 12/31/20    | 1/28/21     | 12/8/21      | 342                    | 59                       |                          | Female          | 66          | 29                     | 64                    |
| 00057 R              |               |                              |                      | Pfizer  | 3/17/21     | 4/7/21      | 12/6/21      | 264                    |                          |                          | Female          | 21          | 29                     | 63                    |
| 00058                |               |                              |                      | Moderna | 12/31/20    | 1/29/21     | 11/19/21     | 323                    |                          |                          | Male            | 55          | 31                     | 60                    |
| 00059 R              |               |                              |                      | Moderna | 12/29/20    | 1/26/21     | 11/19/21     | 325                    |                          |                          | Female          | 40          | 32                     | 60                    |
| 00060 R              |               |                              |                      | Moderna | 12/31/20    | 1/27/21     | 12/8/21      | 342                    |                          |                          | Female          | 50          | 30                     | 63                    |
| 00061 R              | 9/8/21        | PCR                          | yes                  | Pfizer  | 3/8/21      | 3/29/21     | 1/4/22       | 302                    | 118                      |                          | Male            | 42          | 28                     | 56                    |
| 00063 R              | 4/8/20        | PCR                          | no                   | Moderna | 12/30/20    | 1/28/21     | 11/30/21     | 335                    | 601                      |                          | Male            | 45          | 29                     | 59                    |
| 00064 R              |               |                              |                      | Moderna | 12/30/20    | 1/27/21     | 11/24/21     | 329                    |                          |                          | Male            | 34          | 28                     | 62                    |
| 00065 R              | 8/24/21       | PCR                          | yes                  | Moderna | 2/19/21     | 1/29/21     | 12/30/21     | 314                    | 128                      |                          | Female          | 55          | 28                     | 68                    |
| 00067 R              | 1/5/22        | PCR                          | yes                  | Moderna | 4/19/21     | 5/17/21     | 11/22/21     | 217                    |                          | 44                       | Male            | 23          | 30                     | 60                    |
| 00069 R <sup>a</sup> | 1/7/22        | PCR/PCR                      | yes/no               | Moderna | 2/26/21     | 1/30/21     | 11/30/21     | 277                    | 394                      | 38                       | Female          | 47          | 29                     | 62                    |
| 00070 R              |               |                              |                      | Moderna | 1/22/21     | 2/21/21     | 12/9/21      | 321                    |                          |                          | Female          | 63          | 32                     | 60                    |
| 00072 R              | 1/6/22        | Ab <sup>b</sup>              | yes                  | Moderna | 1/28/21     | 12/31/20    | 12/6/21      | 312                    |                          | 31                       | Female          | 46          | 36                     | 56                    |
| 00073 R              | 1/4/22        | PCR                          | yes                  | Moderna | 12/29/20    | 1/26/21     | 12/17/21     | 353                    |                          | 18                       | Male            | 41          | 28                     | 60                    |
| 00075 R              | 1/5/22        | PCR                          | yes                  | Moderna | 12/31/20    | 1/27/21     | 12/8/21      | 342                    |                          | 28                       | Female          | 27          | 29                     | 56                    |
| 00078 R              |               |                              |                      | Moderna | 2/25/21     | 1/30/21     | 11/29/21     | 277                    |                          |                          | Female          | 62          | 30                     | 58                    |
| 00079 R              | 12/29/21      | PCR                          | yes                  | Pfizer  | 12/28/20    | 1/18/21     | 12/4/21      | 341                    |                          | 25                       | Male            | 36          | 30                     | 61                    |
| 00080                |               |                              |                      | Moderna | 3/24/21     | 4/23/21     | 11/30/21     | 251                    |                          |                          | Female          | 51          | 30                     | 58                    |
| 00081 R              |               |                              |                      | Moderna | 12/31/20    | 1/28/21     | 12/10/21     | 344                    |                          |                          | Female          | 57          | 31                     | 62                    |
| 00082 R              | 1/6/22        | PCR                          | no                   | Moderna | 1/12/21     | 2/9/21      | 12/8/21      | 330                    |                          | 29                       | Female          | 56          | 29                     | 56                    |
| 00084 R              |               |                              |                      | Mixed   | 5/6/21      | 6/4/21      | 12/13/21     | 221                    |                          |                          | Male            | 47          | 29                     | 57                    |
| 00085 R              | 1/15/22       | Antigen & Ab <sup>b</sup>    | yes                  | Pfizer  | 1/23/21     | 2/13/21     | 12/3/21      | 314                    |                          | 43                       | Female          | 38          | 32                     | 62                    |
| 00086 R              | 12/29/21      | PCR                          | no                   | Pfizer  | 3/1/21      | 3/23/21     | 12/17/21     | 291                    |                          | 12                       | Male            | 38          | 32                     | 60                    |
| 00089 R              | 1/12/22       | PCR                          | no                   | Moderna | 12/29/20    | 1/26/21     | 12/6/21      | 342                    |                          | 37                       | Male            | 35          | 28                     | 63                    |
| 00092 R              | 4/18/20       | PCR                          | yes                  | Moderna | 1/21/21     | 2/19/21     | 12/10/21     | 323                    | 601                      |                          | Female          | 58          | 32                     | 63                    |
| 00093 R              | 7/1/21        | PCR                          | yes                  | Moderna | 1/5/21      | 2/2/21      | 12/8/21      | 337                    | 160                      |                          | Female          | 51          | 28                     | 61                    |
| 00095 R              | 12/15/20      | PCR                          | yes                  | Moderna | 1/27/21     | 2/24/21     | 12/8/21      | 315                    | 358                      |                          | Male            | 46          | 29                     | 56                    |
| 00096 R              |               |                              |                      | Moderna | 12/31/20    | 1/28/21     | 12/10/21     | 344                    |                          |                          | Female          | 44          | 31                     | 63                    |
| 00097 R              |               |                              |                      | Pfizer  | 4/10/21     | 5/1/21      | 12/10/21     | 244                    |                          |                          | Female          | 37          | 31                     | 59                    |
| 00098                | 9/19/21       | PCR                          | yes                  | Moderna | 1/5/21      | 2/15/21     | 2/2/22       | 393                    | 136                      |                          | Female          | 42          | 28                     | 56                    |
| 00099                |               |                              |                      | Moderna | 3/25/21     | 4/23/21     | 1/6/22       | 287                    |                          |                          | Female          | 32          | 29                     | 60                    |
| 00100                |               |                              |                      | Moderna | 1/12/21     | 2/9/21      | 2/9/22       | 393                    |                          |                          | Male            | 45          | 28                     | 56                    |
| 00101                | 10/19/21      | PCR                          | yes                  | Pfizer  | 3/2/21      | 3/23/21     | 3/10/22      | 373                    | 142                      |                          | Female          | 43          | 28                     | 56                    |

Prior infection group

Post infection group

<sup>a</sup> 00069 R infected both prior- (11/1/20) and post-boost but grouped with latter

<sup>b</sup> Nucleocapsid antibody positive after negative baseline

**Table S2: P values for spike-binding serum antibody increase over time or between group pairs Related to Figures 1 and S1**

| Variant    | Unin <sup>a</sup> day 0-30 | Unin day 0-60 | Unin day 30-60 | Prior infected day 0-30 | Prior infected day 0-60 | <sup>b</sup> Prior infected day 30-60 | Post infected day 0-30 | Post infected day 0-60 | Post infected day 30-60 | Prior vs unin day 0 | <sup>c</sup> Prior vs unin day 60 | Prior vs Post day 0 | <sup>c</sup> Prior vs Post day 60 | Post vs unin day 0 | Post vs unin day 60 | Day 60:0 fold unin vs prior | Day 60:0 fold post vs unin | Day 60:0 fold post vs prior |
|------------|----------------------------|---------------|----------------|-------------------------|-------------------------|---------------------------------------|------------------------|------------------------|-------------------------|---------------------|-----------------------------------|---------------------|-----------------------------------|--------------------|---------------------|-----------------------------|----------------------------|-----------------------------|
| B.1.1.7    | <0.0001                    | <0.0001       | ns             | 0.002                   | 0.002                   | ns                                    | 0.001                  | 0.001                  | 0.0186                  | <0.0001             | ns                                | 0.0014              | 0.0128                            | ns                 | ns                  | <0.0001                     | 0.0080                     | <0.0001                     |
| B.1.640.2  | <0.0001                    | <0.0001       | ns             | 0.0029                  | 0.0186                  | 0.042                                 | 0.001                  | 0.001                  | 0.0322                  | 0.0001              | ns                                | 0.0014              | 0.0052                            | ns                 | 0.0457              | <0.0001                     | 0.0060                     | <0.0001                     |
| BA.1 R346K | <0.0001                    | <0.0001       | ns             | 0.001                   | 0.0049                  | 0.0096                                | 0.001                  | 0.001                  | ns                      | 0.0001              | 0.0065                            | 0.0032              | 0.0024                            | ns                 | ns                  | <0.0001                     | 0.0174                     | <0.0001                     |
| BA.1 L452R | <0.0001                    | <0.0001       | ns             | 0.001                   | 0.0029                  | ns                                    | 0.001                  | 0.001                  | ns                      | <0.0001             | 0.0164                            | 0.0032              | 0.0024                            | ns                 | ns                  | <0.0001                     | 0.0222                     | <0.0001                     |
| BA.2       | <0.0001                    | <0.0001       | ns             | 0.002                   | 0.0049                  | 0.0322                                | 0.001                  | 0.001                  | 0.0244                  | <0.0001             | ns                                | 0.0014              | 0.0041                            | ns                 | 0.0249              | <0.0001                     | 0.0145                     | <0.0001                     |
| BA.3       | <0.0001                    | <0.0001       | ns             | 0.001                   | 0.0049                  | 0.0137                                | 0.001                  | 0.001                  | ns                      | <0.0001             | 0.008                             | 0.0024              | 0.0024                            | ns                 | ns                  | <0.0001                     | 0.0174                     | <0.0001                     |

<sup>a</sup>Uninfected

<sup>b</sup>Decreased from previous timepoint

<sup>c</sup>Decreased vs uninfected or post-infected

**Table S3: *P* values for group by time interaction for mixed-effects model of spike-binding serum antibody titers Related to Figures 1 and S1**

| Variant    | All     | Prior- vs post-<br>infected | Uninfected vs<br>prior-infected | Uninfected vs<br>post-infected |
|------------|---------|-----------------------------|---------------------------------|--------------------------------|
| B.1 D614G  | <0.0001 | <0.0001                     | <0.0001                         | 0.1589                         |
| B.1.1.7    | <0.0001 | <0.0001                     | <0.0001                         | 0.0706                         |
| B.1.315    | <0.0001 | <0.0001                     | <0.0001                         | 0.1589                         |
| B.1.617.2  | <0.0001 | <0.0001                     | <0.0001                         | 0.1589                         |
| B.1.640.2  | <0.0001 | <0.0001                     | <0.0001                         | 0.0683                         |
| BA.1       | <0.0001 | <0.0001                     | <0.0001                         | 0.0683                         |
| BA.1 R346K | <0.0001 | <0.0001                     | <0.0001                         | 0.1034                         |
| BA.1 L452R | <0.0001 | <0.0001                     | <0.0001                         | 0.1589                         |
| BA.2       | <0.0001 | <0.0001                     | <0.0001                         | 0.1034                         |
| BA.3       | <0.0001 | <0.0001                     | <0.0001                         | 0.1589                         |

**Table S4: *P* values for group by time interaction for mixed-effects model of frequencies of spike-binding B cells Related to Figures 2 and S3**

| Spike tetramer  | All     | Prior- vs post-infected | Uninfected vs prior-infected | Uninfected vs post-infected |
|-----------------|---------|-------------------------|------------------------------|-----------------------------|
| B.1 S1          | <0.0001 | <0.0001                 | <0.0001                      | <0.0001                     |
| B.1 RBD         | <0.0001 | <0.0001                 | <0.0001                      | <0.0001                     |
| B.1 NTD         | <0.0001 | <0.0001                 | <0.0001                      | 0.0002                      |
| B.1. & BA.1 RBD | <0.0001 | <0.0001                 | <0.0001                      | <0.0001                     |
| B.1. & BA.1 NTD | <0.0001 | <0.0001                 | <0.0001                      | 0.0001                      |

**Table S5: *P* values for spike-binding secreted antibody increase over time or between group pairs Related to Figures 3 and S4**

| Variant    | Unin <sup>a</sup> day 0-36 | Prior infected day 0-60 | Post infected day 0-60 | Prior vs unin day 0 | <sup>b</sup> Prior vs unin day 60 | Prior vs post day 0 | <sup>b</sup> Prior vs post day 60 | Post vs unin day 0 | Post vs unin day 60 | Day 60:0 fold unin vs prior | Day 60:0 fold post vs unin | Day 60:0 fold post vs prior |
|------------|----------------------------|-------------------------|------------------------|---------------------|-----------------------------------|---------------------|-----------------------------------|--------------------|---------------------|-----------------------------|----------------------------|-----------------------------|
| B.1.1.7    | <0.0001                    | ns                      | 0.001                  | 0.0154              | 0.007                             | 0.0024              | <0.0001                           | ns                 | 0.0029              | <0.0001                     | 0.0002                     | <0.0001                     |
| B.1.640.2  | <0.0001                    | ns                      | 0.001                  | 0.0220              | 0.006                             | 0.0052              | <0.0001                           | ns                 | 0.0045              | <0.0001                     | 0.0004                     | <0.0001                     |
| BA.1 R346K | <0.0001                    | ns                      | 0.001                  | ns                  | 0.0001                            | ns                  | <0.0001                           | ns                 | 0.0060              | <0.0001                     | 0.0001                     | <0.0001                     |
| BA.1 L452R | <0.0001                    | ns                      | 0.001                  | ns                  | 0.0006                            | ns                  | <0.0001                           | ns                 | 0.0039              | <0.0001                     | 0.0002                     | <0.0001                     |
| BA.2       | <0.0001                    | ns                      | 0.001                  | ns                  | 0.0031                            | ns                  | <0.0001                           | ns                 | 0.0031              | <0.0001                     | 0.0007                     | <0.0001                     |
| BA.3       | <0.0001                    | ns                      | 0.001                  | ns                  | 0.0006                            | ns                  | <0.0001                           | ns                 | 0.0033              | <0.0001                     | 0.0001                     | <0.0001                     |

<sup>a</sup>Uninfected

<sup>b</sup>Decreased vs uninfected or post-infected

**Table S6: *P* values for group by time interaction for mixed-effects model of spike-binding secreted antibody titers Related to Figures 3 and S4**

| Variant    | All     | Prior- vs post-infected | Uninfected vs prior-infected | Uninfected vs post-infected |
|------------|---------|-------------------------|------------------------------|-----------------------------|
| B.1 D614G  | <0.0001 | <0.0001                 | <0.0001                      | 0.0001                      |
| B.1.1.7    | <0.0001 | <0.0001                 | <0.0001                      | <0.0001                     |
| B.1.315    | <0.0001 | <0.0001                 | <0.0001                      | 0.0001                      |
| B.1.617.2  | <0.0001 | <0.0001                 | <0.0001                      | 0.0001                      |
| B.1.640.2  | <0.0001 | <0.0001                 | <0.0001                      | 0.0001                      |
| BA.1       | <0.0001 | <0.0001                 | <0.0001                      | <0.0001                     |
| BA.1 R346K | <0.0001 | <0.0001                 | <0.0001                      | 0.0001                      |
| BA.1 L452R | <0.0001 | <0.0001                 | <0.0001                      | 0.0001                      |
| BA.2       | <0.0001 | <0.0001                 | <0.0001                      | 0.0001                      |
| BA.3       | <0.0001 | <0.0001                 | <0.0001                      | 0.0001                      |

**Table S7: 21-color flow cytometry panel  
Related to Figures 2, 6 and S3**

| <b>Antibody or tetramer and fluorochrome</b> |
|----------------------------------------------|
| Mouse anti-human CD45 BUV805                 |
| Mouse anti-human CD19 BV650                  |
| Mouse anti-human CD20 APC-H7                 |
| Mouse anti-human CD10 BV510                  |
| Mouse anti-human IgG PE-Cy7                  |
| Mouse anti-human CD11c BUV395                |
| Mouse anti-human CD3 BV570                   |
| Mouse anti-human IgD BV605                   |
| Mouse anti-human IgM BV711                   |
| Mouse anti-human CD27 BV785                  |
| Mouse anti-human CD21 PE/Dazzle594           |
| Mouse anti-human CD38 APC/Fire810            |
| Mouse anti-human CD71 Alexa Fluor 700        |
| Mouse anti-human IgA VioBlue                 |
| SARS-CoV-2 S1 B.1 PE                         |
| SARS-CoV-2 S-2P B.1 PE-Cy5.5                 |
| SARS-CoV-2 RBD B.1 BV421                     |
| SARS-CoV-2 RBD BA.1 APC                      |
| SARS-CoV-2 S NTD B.1 Alexa Fluor 488         |
| SARS-CoV-2 S NTD BA.1 BUV615                 |
| Zombie NIR Fixable Viability Dye             |
